# Supplementary material for: Structural phase transitions in the kagome lattice based materials Cs2−xRbxSnCu3F12 (x = 0, 0.5, 1.0, 1.5)
Source: Royal Society of Chemistry journal article supplement (doi:10.1039/c4ce00788c), 2014-01-01
Supplement: c4ce00788c4.pdf [file c4ce00788c4.pdf]

## Structural phase transitions in the kagome lattice based materials

### $\text{Cs}_{2-x}\text{Rb}_x\text{SnCu}_3\text{F}_{12}$ ( $x = 0, 0.5, 1.0, 1.5$ )

L. J. Downie<sup>1</sup>, C. Black<sup>1</sup>, E. I. Ardashnikova<sup>2</sup>, C. C. Tang<sup>3</sup>, A. N. Vasiliev<sup>4,5</sup>, A. Golovanov<sup>4</sup>, P. S. Berdonosov<sup>2</sup>, V. A. Dolgikh<sup>2</sup>, P. Lightfoot<sup>1\*</sup>

1. School of Chemistry and EaStChem, University of St Andrews, St Andrews, KY16 9ST, UK.
2. Department of Chemistry, Moscow State University, M.V. Lomonosov Moscow State University, 119991, GSP-1, Moscow, Russia
3. Diamond Light Source Ltd., Harwell Science and Innovation Campus, Didcot, OX11 0DE, UK
4. Department of Low Temperature Physics and Superconductivity, Physics Faculty, M.V. Lomonosov Moscow State University, Moscow 119991, Russia.
5. Theoretical Physics and Applied Mathematics Department, Ural Federal University, 620002 Ekaterinburg, Russia

\*Contact author: pl@st-and.ac.uk

## Supplementary Information

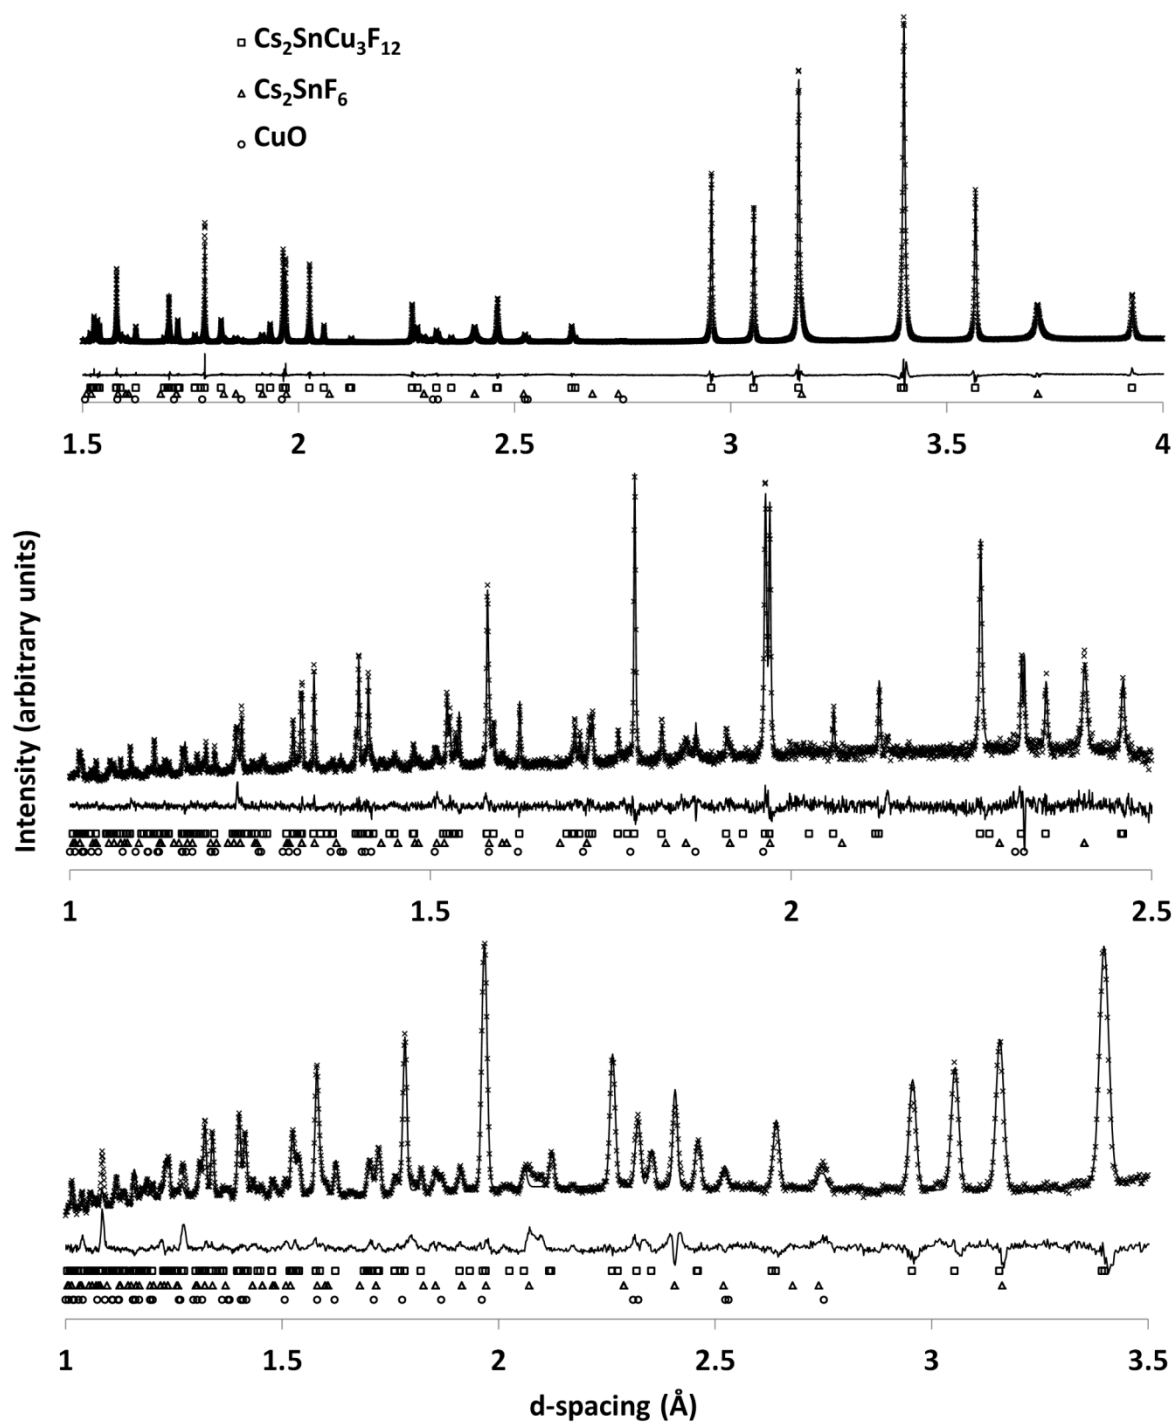

**Figure S1:** Rietveld fits for  $\text{Cs}_2\text{SnCu}_3\text{F}_{12}$  at room temperature: SXP (top) and NPD (lower two; middle is backscattering detector bank, bottom is  $90^\circ$  detector bank.)

**Table S1:** Comparison of fits of various monoclinic unit cell models to the NPD data for Cs<sub>2</sub>SnCu<sub>3</sub>F<sub>12</sub> at 100 K.

| Fitted Space group      | wRp (%) | -Bknd Rp (%) | wRp (%) | Rp (%) |
|-------------------------|---------|--------------|---------|--------|
| <i>P2<sub>1</sub>/n</i> | 4.34    | 3.49         | 4.70    | 3.42   |
| <i>P2<sub>1</sub>/m</i> | 5.18    | 4.09         | 5.45    | 4.25   |
| <i>P2/n</i>             | 5.12    | 4.30         | 6.10    | 4.67   |
| <i>P2/m</i>             | 5.47    | 4.32         | 5.94    | 4.71   |

**Table S2:** Lattice parameters for Cs<sub>2</sub>SnCu<sub>3</sub>F<sub>12</sub> as a function of temperature derived from SXPd data ("run 1").

| Temperature (K)                       | a (Å)        | b (Å)      | c (Å)        | α ° | β °        | γ ° | V (Å <sup>3</sup> ) |
|---------------------------------------|--------------|------------|--------------|-----|------------|-----|---------------------|
| 300                                   | 7.131913(11) | =a         | 20.36532(5)  | 90  | 90         | 120 | 897.0858(28)        |
| 300 (monoclinic equivalent)           | 7.93962      | 7.13191    | 10.67248     | 90  | 98.25995   | 90  | 598.0572            |
| 280                                   | 7.130960(12) | =a         | 20.35025(5)  | 90  | 90         | 120 | 896.184(3)          |
| 280 (monoclinic equivalent)           | 7.93504      | 7.13096    | 10.66844     | 90  | 98.22747   | 90  | 597.456             |
| 260                                   | 7.129898(12) | =a         | 20.33456(5)  | 90  | 90         | 120 | 895.225(3)          |
| 260 (monoclinic equivalent)           | 7.93026      | 7.12990    | 10.66416     | 90  | 98.19415   | 90  | 596.817             |
| 240                                   | 7.128841(12) | =a         | 20.31934(5)  | 90  | 90         | 120 | 894.289(3)          |
| 240 (monoclinic equivalent)           | 7.92560      | 7.12884    | 10.66000     | 90  | 98.16200   | 90  | 596.193             |
| 220 (heating)                         | 7.127702(13) | =a         | 20.30475(5)  | 90  | 90         | 120 | 893.362(3)          |
| 220 (heating) (monoclinic equivalent) | 7.92111      | 7.12770    | 10.65589     | 90  | 98.13210   | 90  | 595.575             |
| 220 (cooling)                         | 7.127737(13) | =a         | 20.30493(6)  | 90  | 90         | 120 | 893.379(3)          |
| 220 (cooling) (monoclinic equivalent) | 7.92117      | 7.12774    | 10.65596     | 90  | 98.13231   | 90  | 595.586             |
| 210 (heating)                         | 7.127123(13) | =a         | 20.29730(6)  | 90  | 90         | 120 | 892.889(3)          |
| 210 (heating) (monoclinic equivalent) | 7.91881      | 7.12712    | 10.65380     | 90  | 98.11680   | 90  | 595.259             |
| 210 (cooling)                         | 7.12720(13)  | =a         | 20.29742(6)  | 90  | 90         | 120 | 892.913(3)          |
| 210 (cooling) (monoclinic equivalent) | 7.91887      | 7.12720    | 10.65389     | 90  | 98.11654   | 90  | 595.275             |
| 200 (heating)                         | 7.126498(13) | =a         | 20.28987(6)  | 90  | 90         | 120 | 892.406(3)          |
| 200 (heating) (monoclinic equivalent) | 7.91651      | 7.12650    | 10.65167     | 90  | 98.10189   | 90  | 594.937             |
| 200 (cooling)                         | 7.126651(13) | =a         | 20.28978(6)  | 90  | 90         | 120 | 892.440(3)          |
| 200 (cooling) (monoclinic equivalent) | 7.91653      | 7.12665    | 10.65179     | 90  | 98.10050   | 90  | 594.960             |
| 190 (heating)                         | 7.125861(14) | =a         | 20.28245(6)  | 90  | 90         | 120 | 891.920(4)          |
| 190 (heating) (monoclinic equivalent) | 7.91420      | 7.12586    | 10.64953     | 90  | 98.08709   | 90  | 594.613             |
| 190 (cooling)                         | 7.126027(13) | =a         | 20.28235(6)  | 90  | 90         | 120 | 891.329(3)          |
| 190 (cooling) (monoclinic equivalent) | 7.91422      | 7.12603    | 10.64966     | 90  | 98.08558   | 90  | 594.219             |
| 180 (heating)                         | 7.124463(15) | =a         | 20.27389(6)  | 90  | 90         | 120 | 891.193(4)          |
| 180 (heating) (monoclinic equivalent) | 7.91135      | 7.12446    | 10.64647     | 90  | 98.07499   | 90  | 594.129             |
| 180 (cooling)                         | 7.124969(14) | =a         | 20.27409(6)  | 90  | 90         | 120 | 891.329(4)          |
| 180 (cooling) (monoclinic equivalent) | 7.91155      | 7.12497    | 10.64697     | 90  | 98.07172   | 90  | 594.219             |
| 170 (heating)                         | 7.91261(8)   | 7.11983(8) | 10.63580(12) | 90  | 98.0341(6) | 90  | 593.302(11)         |
| 170 (cooling)                         | 7.91228(8)   | 7.12088(8) | 10.63694(12) | 90  | 98.0345(6) | 90  | 593.428(11)         |
| 160 (cooling)                         | 7.91058(8)   | 7.11723(7) | 10.62982(11) | 90  | 98.0103(5) | 90  | 592.635(11)         |
| 140                                   | 7.90781(8)   | 7.10996(7) | 10.61670(11) | 90  | 97.9630(5) | 90  | 591.160(10)         |
| 120                                   | 7.90443(8)   | 7.10505(7) | 10.60627(11) | 90  | 97.9189(5) | 90  | 589.983(11)         |
| 100                                   | 7.90102(4)   | 7.10058(4) | 10.59669(6)  | 90  | 97.8770(3) | 90  | 588.885(6)          |

**Table S3:** Lattice parameters for  $\text{Cs}_2\text{SnCu}_3\text{F}_{12}$  as a function of temperature derived from SXPD data (“run 2”).

| Temperature (K)             | a (Å)        | b (Å)      | c (Å)       | $\alpha^\circ$ | $\beta^\circ$ | $\gamma^\circ$ | V (Å <sup>3</sup> ) |
|-----------------------------|--------------|------------|-------------|----------------|---------------|----------------|---------------------|
| 300                         | 7.131728(14) | = a        | 20.36700(6) | 90             | 90            | 120            | 897.113(4)          |
| 300 (monoclinic equivalent) | 7.94005      | 7.13173    | 10.67267    | 90             | 98.26574      | 90             | 598.075             |
| 200                         | 7.126750(16) | = a        | 20.29022(7) | 90             | 90            | 120            | 892.484(4)          |
| 200 (monoclinic equivalent) | 7.91668      | 7.12675    | 10.65197    | 90             | 98.10092      | 90             | 594.989             |
| 190                         | 7.126132(16) | = a        | 20.28167(7) | 90             | 90            | 120            | 891.953(4)          |
| 190 (monoclinic equivalent) | 7.91406      | 7.12613    | 10.64961    | 90             | 98.08299      | 90             | 594.635             |
| 180                         | 7.124720(16) | = a        | 20.27249(7) | 90             | 90            | 120            | 891.196(4)          |
| 180 (monoclinic equivalent) | 7.91102      | 7.12472    | 10.64641    | 90             | 98.06936      | 90             | 594.131             |
| 170                         | 7.91245(4)   | 7.12068(4) | 10.63520(7) | 90             | 98.0288(3)    | 90             | 593.335(6)          |
| 165                         | 7.91165(4)   | 7.11871(4) | 10.63149(6) | 90             | 98.0129(3)    | 90             | 592.927(6)          |
| 160                         | 7.91081(4)   | 7.11689(4) | 10.62815(6) | 90             | 98.0008(3)    | 90             | 592.544(6)          |
| 150                         | 7.90892(4)   | 7.11365(4) | 10.62188(6) | 90             | 97.9775(3)    | 120            | 591.817(6)          |
| 140                         | 7.90691(4)   | 7.11072(4) | 10.61611(6) | 90             | 97.9541(3)    | 120            | 591.136(5)          |

**Table S4:** Lattice parameters for  $\text{Cs}_2\text{SnCu}_3\text{F}_{12}$  as a function of temperature derived from NPD data.

| Temperature (K)             | a (Å)       | b (Å)       | c (Å)        | $\alpha^\circ$ | $\beta^\circ$ | $\gamma^\circ$ | V (Å <sup>3</sup> ) |
|-----------------------------|-------------|-------------|--------------|----------------|---------------|----------------|---------------------|
| 300                         | 7.13155(6)  | = a         | 20.3610(3)   | 90             | 90            | 120            | 896.801(18)         |
| 300 (monoclinic equivalent) | 7.93829     | 7.13155     | 10.67124     | 90             | 98.25131      | 90             | 597.867             |
| 165                         | 7.8951(3)   | 7.1196(4)   | 10.6398(5)   | 90             | 98.0747(29)   | 90             | 592.13(5)           |
| 150                         | 7.90569(17) | 7.10976(18) | 10.61490(29) | 90             | 97.9377(16)   | 90             | 590.921(26)         |
| 100                         | 7.89656(16) | 7.09752(15) | 10.58758(25) | 90             | 97.8209(16)   | 90             | 587.871(22)         |

**Table S5:** BVS of  $\text{Cs}_2\text{SnCu}_3\text{F}_{12}$  as a function of temperature.

| Temperature (K) | BVS              |                  |                  |                  |
|-----------------|------------------|------------------|------------------|------------------|
|                 | Sn <sup>4+</sup> | Cu <sup>1+</sup> | Cu <sup>2+</sup> | Cs <sup>1+</sup> |
| 300             | 4.626            |                  | 2.016            | 1.039            |
| 165             | 4.508            | 1.926            | 2.050            | 0.887            |
| 150             | 4.502            | 2.106            | 1.972            | 0.908            |
| 100             | 4.554            | 2.030            | 2.002            | 0.942            |

**Table S6:** Bond lengths for  $\text{Cs}_2\text{SnCu}_3\text{F}_{12}$  at 300 K and 100 K as derived from NPD data.

| Metal – fluoride bond | Bond length (Å) |               |
|-----------------------|-----------------|---------------|
|                       | 300 K           | 100 K         |
| Cs – F3               |                 | 3.058(11)     |
| Cs – F1               |                 | 3.161(10)     |
| Cs – F1               | 3.115(4) (x3)   | 3.291(9)      |
| Cs – F2               | 3.418(4) (x3)   | 3.042(10)     |
| Cs – F4               |                 | 3.265(11)     |
| Cs – F5               |                 | 3.303(11)     |
| Cs – F5               |                 | 3.388(10)     |
| Cs – F6               |                 | 3.367(11)     |
| Cu1 – F2              |                 | 1.934(8) (x2) |
| Cu1 – F1              | 1.8983(8) (x4)  | 1.874(8) (x2) |
| Cu1 – F6              | 2.3564(28) (x2) | 2.304(7) (x2) |
| Cu2 – F3              |                 | 1.976(11)     |
| Cu2 – F1              |                 | 1.925(9)      |
| Cu2 – F2              |                 | 1.878(10)     |
| Cu2 – F3              |                 | 1.839(11)     |
| Cu2 – F4              |                 | 2.351(8)      |
| Cu2 – F5              |                 | 2.355(9)      |
| Sn – F6               |                 | 1.940(7) (x2) |
| Sn – F4               |                 | 1.945(7) (x2) |
| Sn – F5               |                 | 1.950(6) (x2) |
| Sn – F2               | 1.9392(27) (x6) |               |

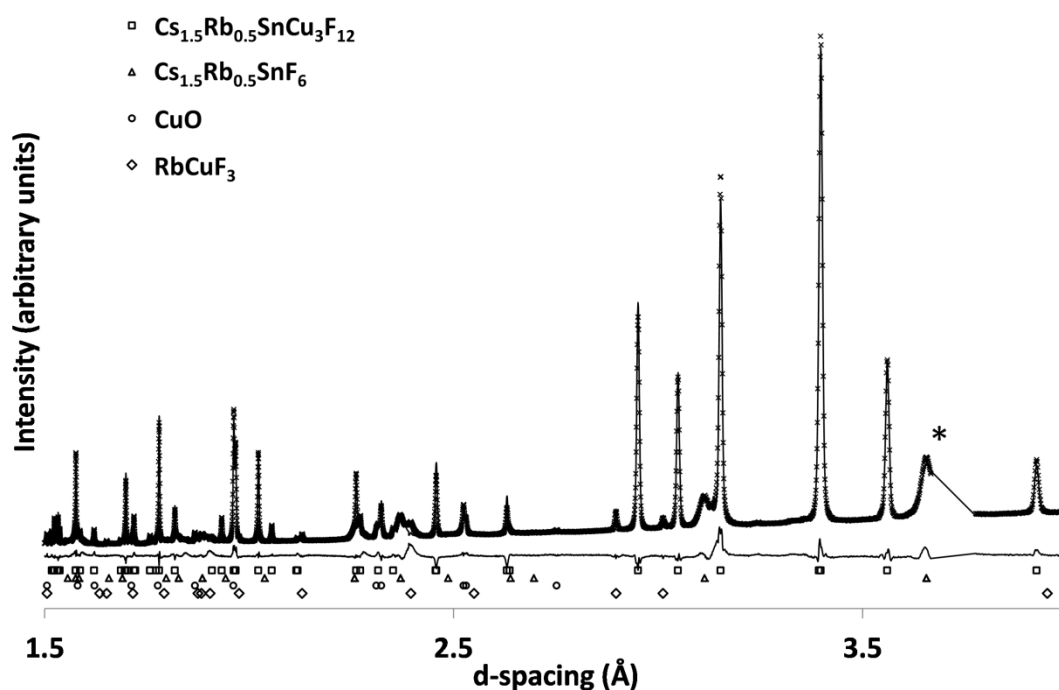

**Figure S2:** Rietveld refinement of SXPD data for  $\text{Cs}_{1.5}\text{Rb}_{0.5}\text{SnCu}_3\text{F}_{12}$  at 300 K (\* is an excluded area due to difficulty in fitting – most likely due to phase separation between the impurities  $\text{Cs}_2\text{SnF}_6$  and  $\text{Rb}_2\text{SnF}_6$ ).

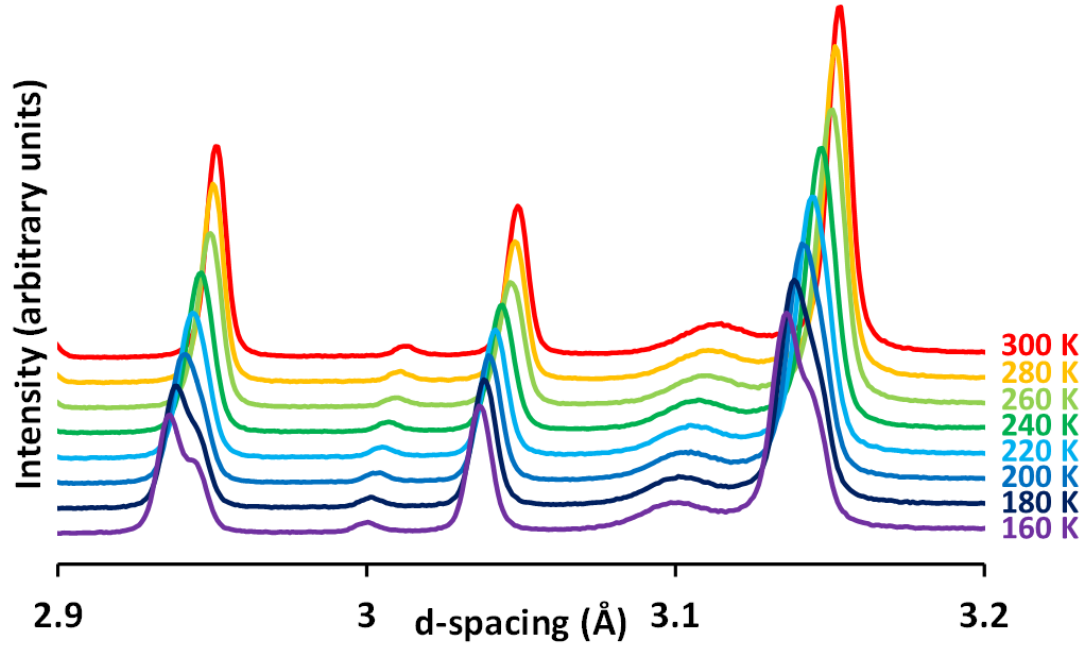

Figure S3: SXP patterns for  $\text{Cs}_{1.5}\text{Rb}_{0.5}\text{SnCu}_3\text{F}_{12}$  over the temperature range 300 – 160 K.

Table S7: Lattice parameters for  $\text{Cs}_{1.5}\text{Rb}_{0.5}\text{SnCu}_3\text{F}_{12}$  as a function of temperature derived from SXP data.

| Temperature (K)             | a (Å)      | b (Å)      | c (Å)        | $\alpha^\circ$ | $\beta^\circ$ | $\gamma^\circ$ | V (Å <sup>3</sup> ) |
|-----------------------------|------------|------------|--------------|----------------|---------------|----------------|---------------------|
| 300                         | 7.12113(2) | = a        | 20.35953(10) | 90             | 90            | 120            | 894.120(6)          |
| 300 (monoclinic equivalent) | 7.93475    | 7.12113    | 10.66165     | 90             | 98.3255       | 90             | 596.080             |
| 290                         | 7.12030(2) | = a        | 20.35171(9)  | 90             | 90            | 120            | 893.569(6)          |
| 290 (monoclinic equivalent) | 7.93227    | 7.12030    | 10.65925     | 90             | 98.3115       | 90             | 595.713             |
| 280                         | 7.11915(2) | = a        | 20.34356(10) | 90             | 90            | 120            | 892.924(6)          |
| 280 (monoclinic equivalent) | 7.92960    | 7.11915    | 10.65650     | 90             | 98.2986       | 90             | 595.283             |
| 270                         | 7.11738(3) | = a        | 20.33477(11) | 90             | 90            | 120            | 892.092(7)          |
| 270 (monoclinic equivalent) | 7.92657    | 7.11738    | 10.65305     | 90             | 98.2888       | 90             | 594.728             |
| 260                         | 7.11636(3) | = a        | 20.33190(13) | 90             | 90            | 120            | 891.711(9)          |
| 260 (monoclinic equivalent) | 7.92544    | 7.11636    | 10.65154     | 90             | 98.2887       | 90             | 594.474             |
| 250                         | 7.92512(7) | 7.10748(6) | 10.64518(11) | 90             | 98.2227(5)    | 90             | 593.453(9)          |
| 240                         | 7.92649(6) | 7.10836(6) | 10.63926(10) | 90             | 98.2094(5)    | 90             | 593.319(9)          |
| 230                         | 7.92065(5) | 7.10332(5) | 10.62659(8)  | 90             | 98.1951(5)    | 90             | 591.778(7)          |
| 220                         | 7.91831(5) | 7.10094(5) | 10.61998(7)  | 90             | 98.1779(4)    | 90             | 591.062(7)          |
| 210                         | 7.91596(5) | 7.09596(4) | 10.61376(7)  | 90             | 98.1582(4)    | 90             | 590.363(6)          |
| 200                         | 7.91366(4) | 7.09596(4) | 10.60799(7)  | 90             | 98.1364(4)    | 90             | 589.696(6)          |
| 190                         | 7.91148(4) | 7.09358(4) | 10.60274(6)  | 90             | 98.1151(4)    | 90             | 589.075(6)          |
| 180                         | 7.90935(4) | 7.09126(4) | 10.59762(6)  | 90             | 98.0823(5)    | 90             | 588.472(6)          |
| 170                         | 7.90729(4) | 7.08902(4) | 10.59274(6)  | 90             | 98.0705(4)    | 90             | 587.895(6)          |
| 160                         | 7.90525(4) | 7.08694(4) | 10.58807(6)  | 90             | 98.0487(4)    | 90             | 587.343(6)          |
| 150                         | 7.90335(4) | 7.08493(4) | 10.58370(6)  | 90             | 98.0272(4)    | 90             | 586.824(6)          |
| 140                         | 7.90139(4) | 7.08305(4) | 10.57952(6)  | 90             | 98.0060(4)    | 90             | 586.316(6)          |
| 130                         | 7.89947(4) | 7.08120(4) | 10.57533(6)  | 90             | 97.9852(4)    | 90             | 585.824(6)          |
| 120                         | 7.89764(4) | 7.07951(4) | 10.57135(6)  | 90             | 97.9650(4)    | 90             | 585.358(6)          |
| 110                         | 7.89575(4) | 7.07788(4) | 10.56755(6)  | 90             | 97.9447(4)    | 90             | 584.901(6)          |
| 100                         | 7.89388(4) | 7.07631(4) | 10.56384(6)  | 90             | 97.9246(4)    | 90             | 584.456(6)          |

**Table S8:** Comparison of standard rhombohedral model fits for CsRbSnCu<sub>3</sub>F<sub>12</sub>

|             | Fitted |      | -Bknd |      |
|-------------|--------|------|-------|------|
|             | wRp    | Rp   | wRp   | Rp   |
| $R\bar{3}$  | 4.87   | 3.08 | 11.41 | 6.33 |
| $R\bar{3}m$ | 4.69   | 2.97 | 10.61 | 5.88 |
| $P2_1/n$    | 3.85   | 2.51 | 7.96  | 4.67 |

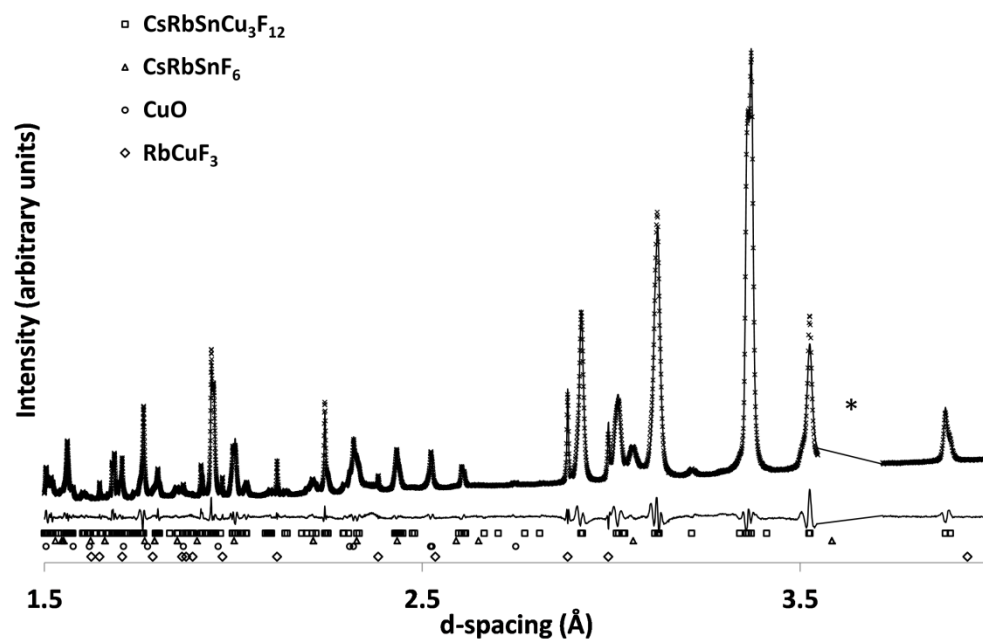

**Figure S4:** XSPD data and Rietveld refinement for CsRbSnCu<sub>3</sub>F<sub>12</sub> at 100 K (\* is an excluded area due to difficulty in fitting – most likely due to phase separation between the impurities Cs<sub>2</sub>SnF<sub>6</sub> and Rb<sub>2</sub>SnF<sub>6</sub>).

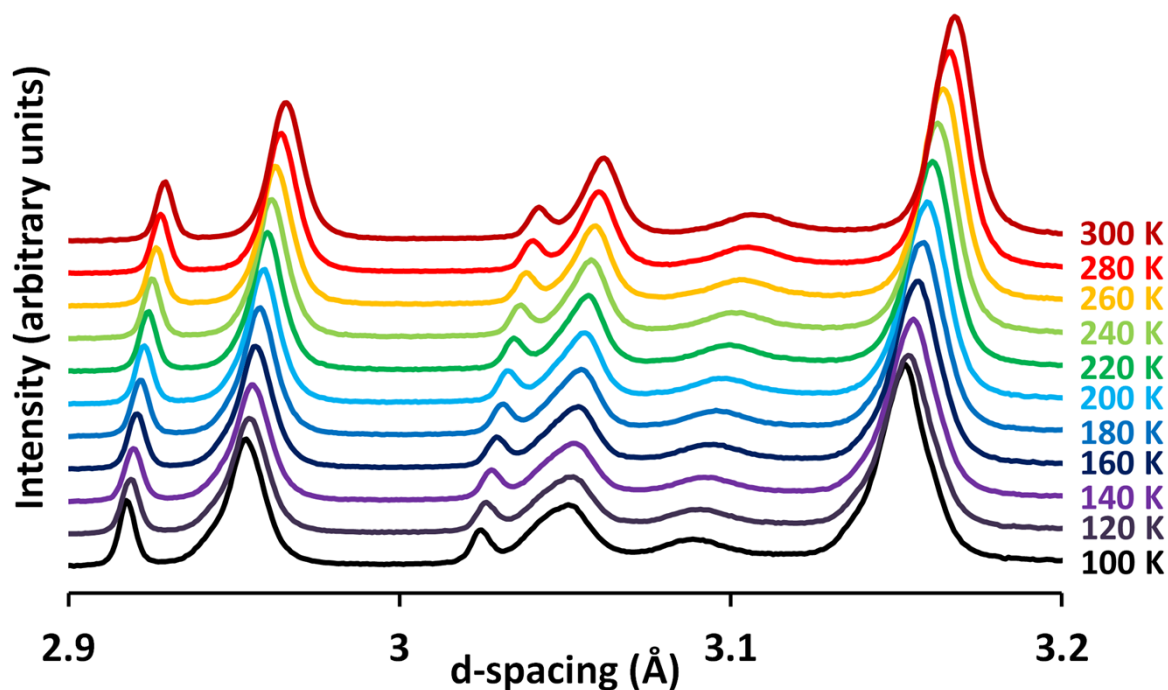

Figure S5: SXPD patterns for CsRbSnCu<sub>3</sub>F<sub>12</sub> over the temperature range 300 – 100 K.

Table S9: Lattice parameters for CsRbSnCu<sub>3</sub>F<sub>12</sub> as a function of temperature derived from SXPD data.

| Temperature (K) | a (Å)       | b (Å)       | c (Å)        | $\alpha$ ° | $\beta$ °   | $\gamma$ ° | V (Å <sup>3</sup> ) |
|-----------------|-------------|-------------|--------------|------------|-------------|------------|---------------------|
| 300             | 7.92369(9)  | 7.08376(7)  | 10.60375(12) | 90         | 98.7057(8)  | 90         | 588.326(11)         |
| 290             | 7.92193(9)  | 7.08134(8)  | 10.59904(12) | 90         | 98.6826(9)  | 90         | 587.769(11)         |
| 280             | 7.92011(9)  | 7.07871(8)  | 10.59437(12) | 90         | 98.6567(9)  | 90         | 587.198(12)         |
| 270             | 7.91923(9)  | 7.07505(9)  | 10.59036(12) | 90         | 98.6184(9)  | 90         | 586.666(12)         |
| 260             | 7.91779(8)  | 7.07177(8)  | 10.58685(12) | 90         | 98.585(9)   | 90         | 586.145(11)         |
| 250             | 7.91536(8)  | 7.06978(8)  | 10.58305(12) | 90         | 98.5642(9)  | 90         | 585.622(11)         |
| 240             | 7.91285(8)  | 7.06796(8)  | 10.57919(12) | 90         | 98.4557(9)  | 90         | 585.102(11)         |
| 230             | 7.91030(8)  | 7.06634(8)  | 10.57542(12) | 90         | 98.5268(9)  | 90         | 584.599(11)         |
| 220             | 7.90756(8)  | 7.06498(8)  | 10.57144(12) | 90         | 98.5113(9)  | 90         | 584.088(11)         |
| 210             | 7.90484(8)  | 7.06356(8)  | 10.56758(12) | 90         | 98.4945(9)  | 90         | 583.582(12)         |
| 200             | 7.90202(9)  | 7.06241(9)  | 10.56365(13) | 90         | 98.4791(9)  | 90         | 583.085(12)         |
| 190             | 7.89935(9)  | 7.06121(9)  | 10.56007(13) | 90         | 98.4641(10) | 90         | 582.614(13)         |
| 180             | 7.89665(10) | 7.06003(10) | 10.55656(14) | 90         | 98.4484(10) | 90         | 582.148(13)         |
| 170             | 7.89392(10) | 7.05902(10) | 10.55307(14) | 90         | 98.4352(11) | 90         | 581.691(14)         |
| 160             | 7.89124(11) | 7.05815(11) | 10.54971(15) | 90         | 98.4227(11) | 90         | 581.256(15)         |
| 150             | 7.88868(11) | 7.05724(11) | 10.54652(16) | 90         | 98.4090(12) | 90         | 580.837(15)         |
| 140             | 7.88611(12) | 7.05639(12) | 10.54343(17) | 90         | 98.3967(13) | 90         | 580.426(16)         |
| 130             | 7.88363(12) | 7.05546(13) | 10.54053(17) | 90         | 98.3830(13) | 90         | 580.028(17)         |
| 120             | 7.88108(13) | 7.05486(13) | 10.53760(18) | 90         | 98.3715(14) | 90         | 579.647(17)         |
| 110             | 7.87887(13) | 7.05384(13) | 10.53484(18) | 90         | 98.3573(14) | 90         | 579.270(18)         |
| 100             | 7.87649(14) | 7.05304(14) | 10.53210(19) | 90         | 98.3443(14) | 90         | 578.898(18)         |



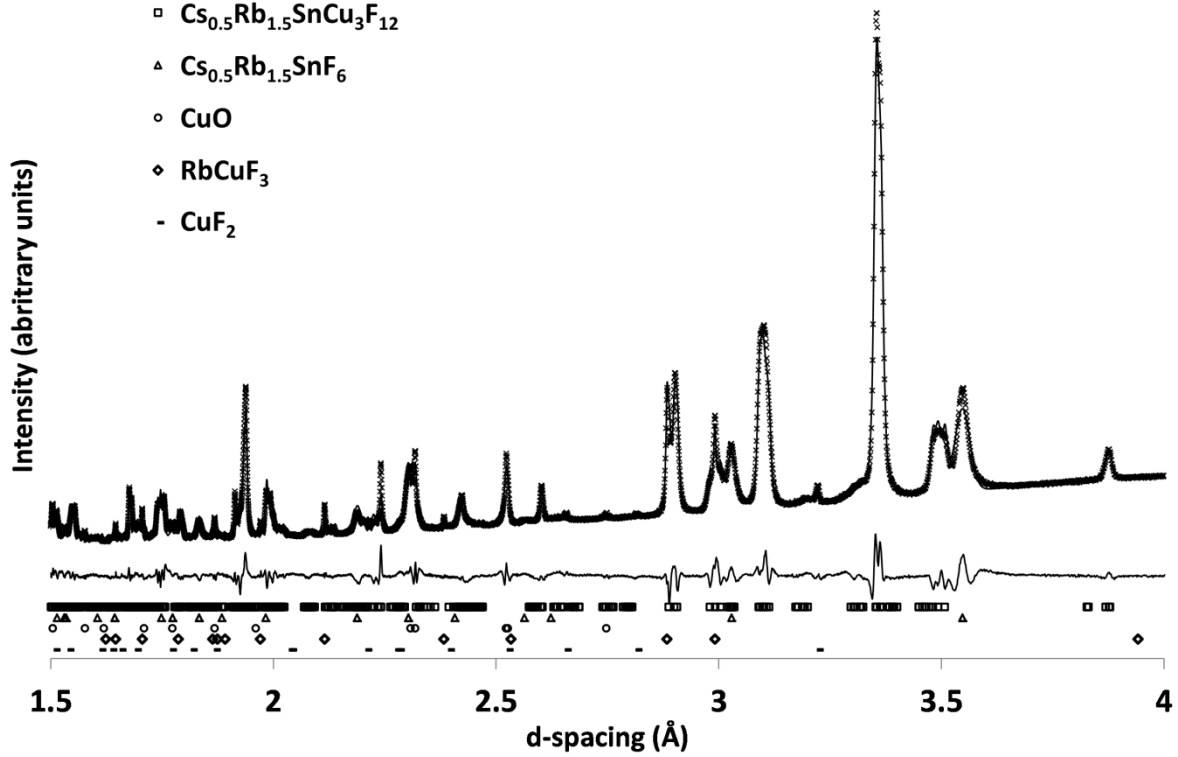

Figure S6: XSPD data and Rietveld refinement for  $\text{Cs}_{0.5}\text{Rb}_{1.5}\text{SnCu}_3\text{F}_{12}$  at 100 K.

Table S10: Lattice parameters for  $\text{Cs}_{0.5}\text{Rb}_{1.5}\text{SnCu}_3\text{F}_{12}$  as a function of temperature derived from XSPD data.

| Temperature (K)            | a (Å)        | b (Å)        | c (Å)        | $\alpha^\circ$ | $\beta^\circ$ | $\gamma^\circ$ | V (Å <sup>3</sup> ) |
|----------------------------|--------------|--------------|--------------|----------------|---------------|----------------|---------------------|
| 300                        | 14.01939(12) | = a          | 20.35651(26) | 90             | 90            | 120            | 3464.91(6)          |
| 300 (triclinic equivalent) | 10.56280     | 10.56280     | 10.56280     | 83.16018       | 83.16018      | 83.16018       | 1154.97             |
| 290                        | 14.01676(12) | = a          | 20.34747(26) | 90             | 90            | 120            | 3462.07(6)          |
| 290 (triclinic equivalent) | 10.55898     | 10.55898     | 10.55898     | 83.17094       | 83.17094      | 83.17094       | 1154.02             |
| 280                        | 14.01399(12) | = a          | 20.33782(27) | 90             | 90            | 120            | 3459.07(6)          |
| 280 (triclinic equivalent) | 10.55569     | 10.55569     | 10.55569     | 83.18255       | 83.18255      | 83.18255       | 1153.02             |
| 270                        | 10.54210(23) | 10.56569(19) | 10.55035(29) | 83.2983(12)    | 83.1014(11)   | 83.1905(15)    | 1152.13(5)          |
| 260                        | 10.53850(23) | 10.56347(18) | 10.54686(28) | 83.3136(12)    | 83.1112(11)   | 83.2014(15)    | 1151.20(4)          |
| 250                        | 10.53449(22) | 10.56179(17) | 10.54338(27) | 83.3331(12)    | 83.1196(11)   | 83.2126(15)    | 1150.28(4)          |
| 240                        | 10.53035(22) | 10.56098(18) | 10.53974(26) | 83.3565(12)    | 83.1256(11)   | 83.2250(14)    | 1149.43(4)          |
| 230                        | 10.52545(21) | 10.56131(16) | 10.53611(24) | 83.3865(12)    | 83.1277(11)   | 83.2375(14)    | 1148.63(4)          |
| 220                        | 10.52050(20) | 10.56163(15) | 10.53238(23) | 83.4237(12)    | 83.1252(11)   | 83.2487(13)    | 1147.81(4)          |
| 210                        | 10.51582(20) | 10.56093(15) | 10.52853(22) | 83.4591(12)    | 83.1228(12)   | 83.2593(13)    | 1146.90(4)          |
| 200                        | 10.51138(19) | 10.55954(15) | 10.52476(21) | 83.4920(12)    | 83.1201(12)   | 83.2652(13)    | 1145.93(4)          |
| 190                        | 10.50734(19) | 10.55796(15) | 10.52121(21) | 83.5193(12)    | 83.1206(12)   | 83.2716(12)    | 1145.00(4)          |
| 180                        | 10.50338(19) | 10.55607(15) | 10.51787(20) | 83.5455(12)    | 83.1227(12)   | 83.2776(12)    | 1144.07(4)          |
| 170                        | 10.49971(18) | 10.55405(15) | 10.51474(20) | 83.5687(12)    | 83.1266(12)   | 83.2845(12)    | 1143.18(3)          |
| 160                        | 10.49620(18) | 10.55204(15) | 10.51195(20) | 83.5882(12)    | 83.1333(12)   | 83.2921(12)    | 1142.35(3)          |
| 150                        | 10.49307(18) | 10.54984(15) | 10.50924(20) | 83.6069(12)    | 83.1392(12)   | 83.2987(13)    | 1141.45(3)          |
| 140                        | 10.48993(18) | 10.54764(15) | 10.50657(20) | 83.6236(12)    | 83.1479(12)   | 83.3061(13)    | 1140.74(3)          |
| 130                        | 10.48699(18) | 10.54547(15) | 10.50415(20) | 83.6387(12)    | 83.1566(12)   | 83.3137(13)    | 1139.99(3)          |
| 120                        | 10.48430(18) | 10.54328(15) | 10.50172(20) | 83.6526(12)    | 83.1663(12)   | 83.3213(13)    | 1139.26(3)          |
| 110                        | 10.48171(18) | 10.54113(15) | 10.49960(20) | 83.6637(12)    | 83.1761(12)   | 83.3282(13)    | 1138.58(3)          |
| 100                        | 10.47920(18) | 10.53895(15) | 10.49737(19) | 83.6769(12)    | 83.1853(12)   | 83.3358(13)    | 1137.89(3)          |

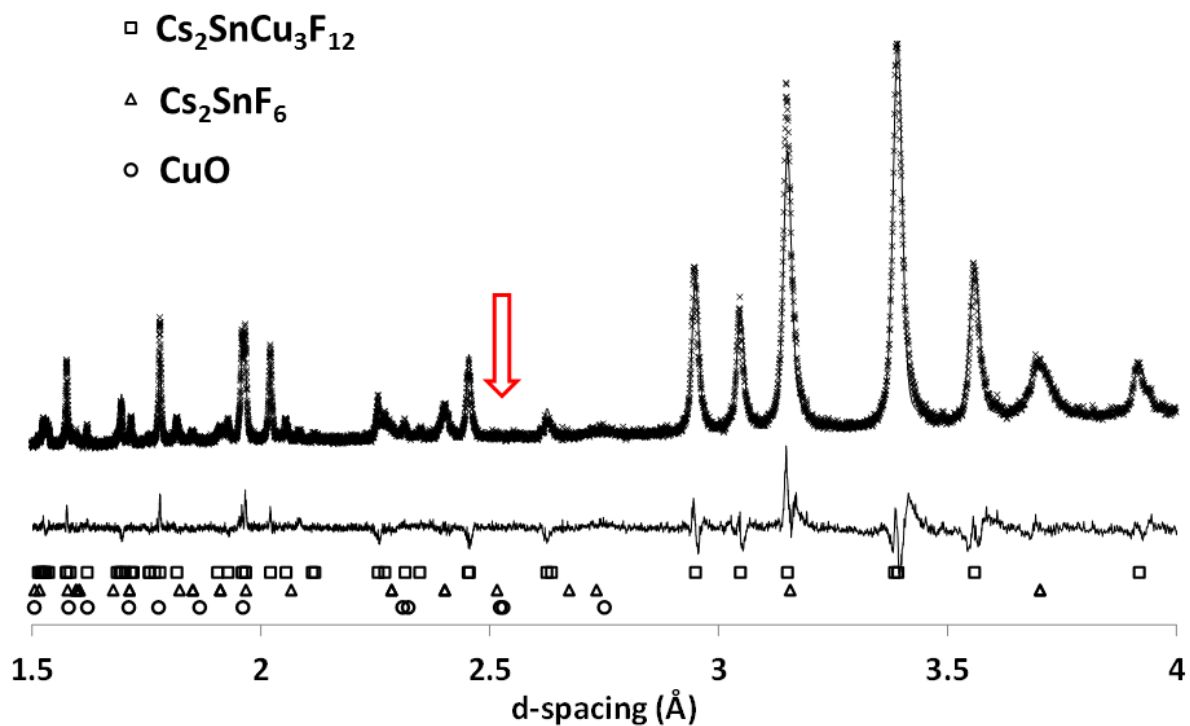

**Figure S7:** PXRD data and Rietveld refinement (at room temperature) for the sample of  $\text{Cs}_2\text{SnCu}_3\text{F}_{12}$  used for the magnetic measurement. Tick marks are shown for  $\text{CuO}$  and the red arrow indicates the position of the strongest  $\text{CuO}$  reflection: this confirms that  $\text{CuO}$  is absent in this case, but is apparent in powders that have been synthesised by other methods.
